# Supplementary material
Source: MDPI journal article supplement (https://www.mdpi.com/2571-9408/5/3/116)
Supplement: s1 [file s1 › heritage-1817310-supplementary.pdf]

## Supplementary material. Notes for the semi-structural interviews

1. Experiences and interest in the subject:  
We have identified several topics, such as cultural landscape, urban landscape, buildings, ruins, and archeological heritage.
  - Which ones of these topics are you most familiar with and want to talk about?
  - Are there other relevant topics to discuss?
2. The current situation:
  - What kind of climate-related initiatives are relevant and, in your opinion, have the most threatening consequences for cultural heritage (both direct, indirect, and visual consequences)?
  - Describe the consequences of these initiatives on cultural heritage. In what way do they affect cultural heritage? What are the most serious threats against cultural heritage today, in your opinion?
  - Good and bad effects on cultural heritage?
  - Climate-related initiatives with equal focus on cultural heritage and nature?
  - Which sectors of the society carry out climate-related initiatives with severe impacts on cultural heritage?
  - Climate-related initiatives that, in a faulty way, treat cultural heritage like a non-essential issue.
  - Are there specific regions in your country with particular challenges? Differences between the regions?
  - Other topics?
3. The future situation
  - Do you have any good examples of climate-related initiatives that will secure cultural heritage in an altered climate-situation in the future?
  - Suggestions for improvements?
  - In what areas is there a lack of initiatives or systems that recognize consequences of climate-initiatives on cultural heritage?
  - If you could foretell the future condition – which are the worst threats?
  - What are the 2-3 most important topics related to future threats on cultural heritage?
4. Adjustments to climate-changes – plans and public administration
  - What kind of plans which include or should include cultural heritage are carried out on a national, regional, and local (municipal) basis? Would you please send a link or a pdf? Do Sweden, Denmark, and Iceland have policy-documents on a national level? Is there a need for further legislation?
  - Anything else relevant for the topic?
  - Anyone else that we should contact?
  - Any literature, articles, websites, or research project (national/international)?
